# Supplementary material for: The Cryptococcus neoformans Titan cell is an inducible and regulated morphotype underlying pathogenesis
Source: PubMed Central journal article supplement (PMC5959070; doi:10.1371/journal.ppat.1006978), 2018-05-18
Supplement: ppat.1006978.s005.pdf [file ppat.1006978.s005.pdf]

**Table S1. *Cryptococcus* strains relevant to this work**

| <b>Name</b> | <b>Description</b>                        | <b>Genotype</b>                         | <b>Parent</b> | <b>Source</b> |
|-------------|-------------------------------------------|-----------------------------------------|---------------|---------------|
| H99         | Clinical isolate,<br>type strain          | VNI MAT $\alpha$                        |               | [58]          |
| JKH7        | <i>pka1</i> $\Delta$                      | <i>pka1::URA ura-</i> MAT $\alpha$      | H99           | [59]          |
| CDX19       | <i>gpr4</i> $\Delta$ <i>gpr5</i> $\Delta$ | <i>GPR4::NEO GPR5::NAT</i> MAT $\alpha$ | H99           | [60]          |
| YSB83       | <i>gpa1</i> $\Delta$                      | <i>GPA1::NAT</i> MAT $\alpha$           | H99           | [34]          |
| 6E9         | <i>ric8</i> $\Delta$                      | <i>RIC8::NAT</i> MAT $\alpha$           | H99           | [62]          |
| 19G11       | <i>usv101</i> $\Delta$                    | <i>USV101::NAT</i> MAT $\alpha$         | H99           | [62]          |
| YSB42       | <i>cac1</i> $\Delta$                      | <i>CAC1::NAT</i> MAT $\alpha$           | H99           | [34]          |
| <i>Zc1</i>  | Clinical isolate                          | VNI MAT $\alpha$                        |               | [40]          |
| <i>Zc08</i> | Clinical isolate                          | VNI MAT $\alpha$                        |               | [40]          |
| <i>Zc12</i> | Clinical isolate                          | VNI MAT $\alpha$                        |               | [40]          |
| <i>R265</i> | Clinical isolate,<br><i>C. gattii</i>     |                                         |               | [61]          |
